# Supplementary material for: Analysis of trivalent cation complexation to functionalized mesoporous silica using solid-state NMR spectroscopy
Source: Royal Society of Chemistry journal article supplement (doi:10.1039/c4dt02380c), 2014-01-01
Supplement: c4dt02380c1.pdf [file c4dt02380c1.pdf]

## Analysis of Trivalent Cation Complexation to Functionalized Mesoporous Silica using Solid-State NMR Spectroscopy

Jennifer Shusterman<sup>†</sup>, Harris Mason<sup>‡</sup>, Anthony Bruchet<sup>†</sup>, Mavrik Zavarin<sup>‡</sup>, Annie B. Kersting<sup>‡</sup>, and Heino Nitsche<sup>†</sup>

<sup>†</sup>Department of Chemistry, University of California, Berkeley; Berkeley, California, 94720.

<sup>‡</sup>Glenn T. Seaborg Institute, Physical and Life Sciences Directorate, Lawrence Livermore National Laboratory, L-231, PO Box 808, Livermore, California, 94550.

### Supplemental Information

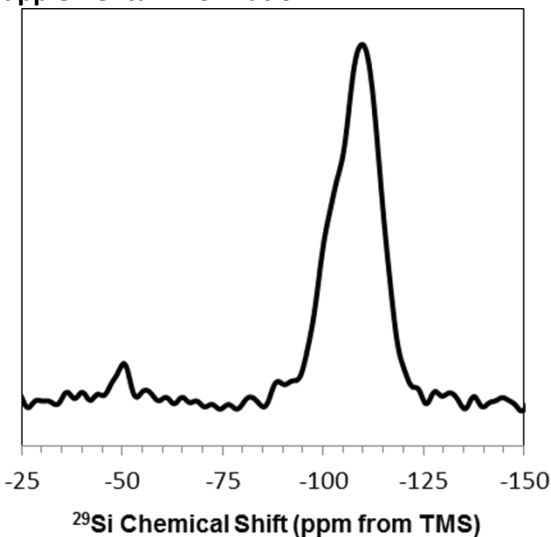

Figure S1. <sup>29</sup>Si{<sup>1</sup>H} SP/MAS NMR spectra for pristine CA-SBA. The resonances for the bulk silicon atoms are the Q peaks (Q<sup>2</sup>, Q<sup>3</sup>, and Q<sup>4</sup> have shifts of  $\delta_{\text{Si}} = -93$ ,  $-97$ , and  $-107$  ppm, respectively) and for the surface silicon atoms are the T peaks (T<sup>1</sup>, T<sup>2</sup>, and T<sup>3</sup> have shifts of  $\delta_{\text{Si}} = -51$ ,  $-58$ , and  $-66$  ppm, respectively).

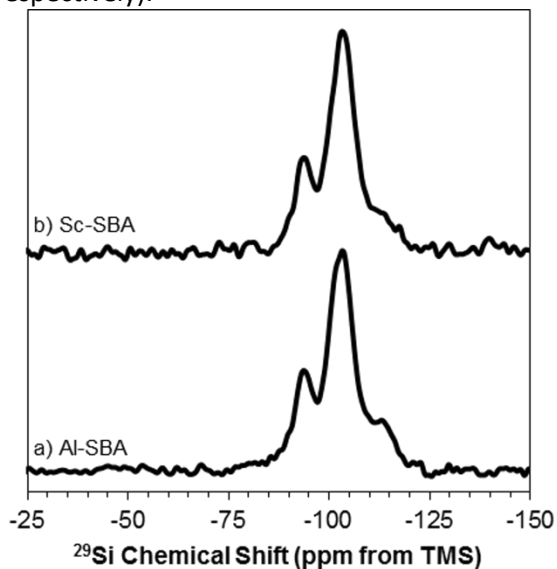

Figure S2.  $^{29}\text{Si}\{^1\text{H}\}$  CP/MAS NMR spectra for solids from a) Al (Al-SBA and b) Sc (Sc-SBA) sorption to bare SBA-15. The resonances for the bulk silicon atoms are the Q peaks ( $\text{Q}^2$ ,  $\text{Q}^3$ , and  $\text{Q}^4$  have shifts of  $\delta_{\text{Si}} = -93$ ,  $-97$ , and  $-107$  ppm, respectively).

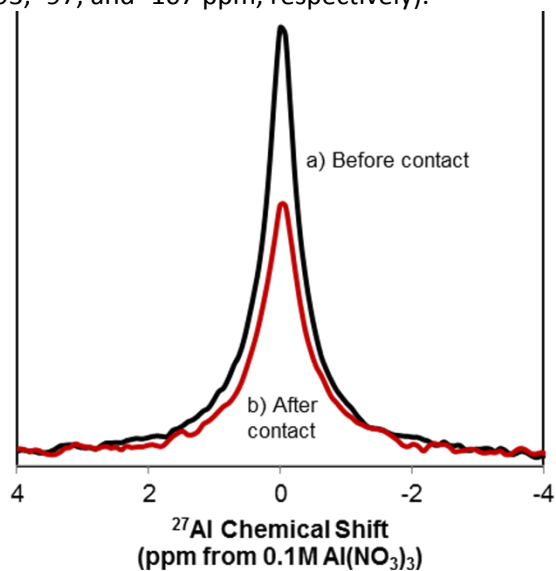

Figure S3.  $^{27}\text{Al}$  SP/MAS NMR spectra of solution from Al sorption to CA functionalized SBA-15 a) before contact with CA-SBA and b) after contact with CA-SBA for 24 hours.

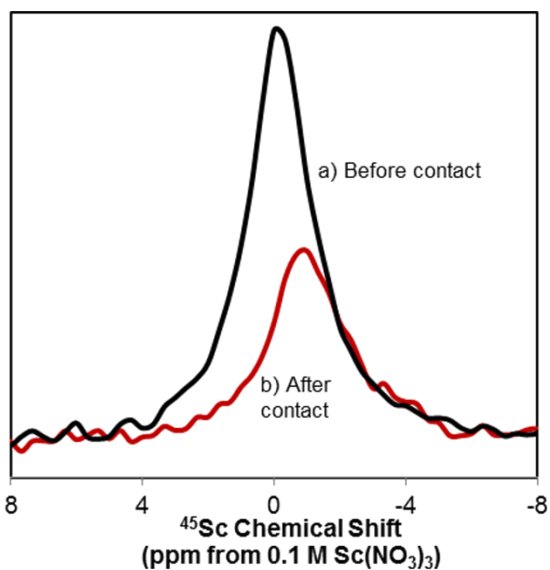

Figure S4.  $^{45}\text{Sc}$  SP/MAS NMR spectra of solution from Sc sorption to CA functionalized SBA-15 a) before contact with CA-SBA and b) after contact with CA-SBA for 24 hours.

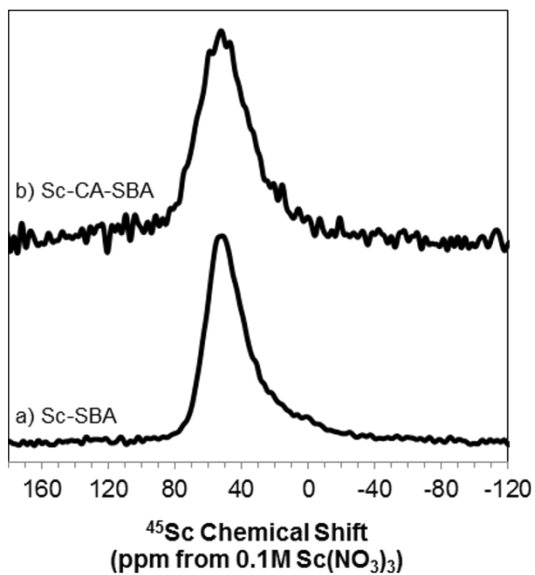

Figure S5.  $^{45}\text{Sc}$  SP/MAS NMR spectra of solids from a) Sc sorption to bare SBA-15 (Sc-SBA) and b) CA functionalized SBA-15 (Sc-CA-SBA) collected on 500 MHz spectrometer. The chemical shifts for 6, 7, and 8-coordinated Sc occur in the ranges of  $\delta_{\text{Sc}}=100$  to 160 ppm,  $\delta_{\text{Sc}} = 10$  to 70 ppm, and  $\delta_{\text{Sc}} = -10$  to -50 ppm, respectively.<sup>28</sup>

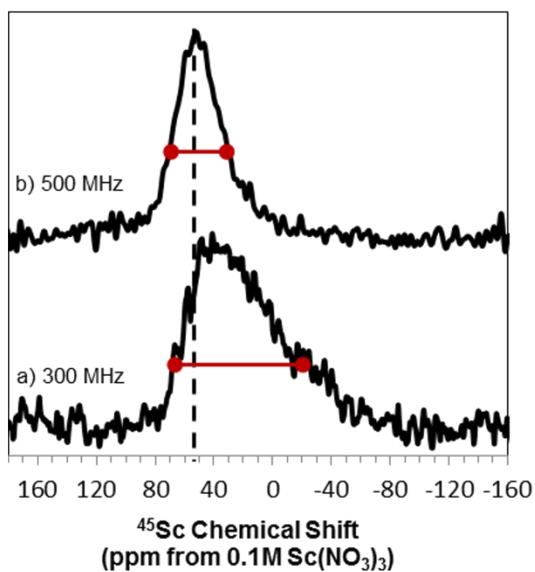

Figure S6.  $^{45}\text{Sc}$  SP/MAS NMR spectra of solids from Sc sorption to CA functionalized SBA-15 (Sc-CA-SBA) on a) the 300 MHz spectrometer and b) the 500 MHz spectrometer. The chemical shifts for 6, 7, and 8-coordinated Sc occur in the ranges of  $\delta_{\text{Sc}}=100$  to 160 ppm,  $\delta_{\text{Sc}} = 10$  to 70 ppm, and  $\delta_{\text{Sc}} = -10$  to -50 ppm, respectively.<sup>28</sup>
